# Supplementary material for: 3-Nitroatenolol: First Synthesis, Chiral Resolution and Enantiomers’ Absolute Configuration
Source: MDPI journal article supplement (doi:10.3390/molecules29071598), 2024-04-03
Supplement: s1 [file molecules-2920724-supplementary.pdf › molecules-2920724-supplementary.pdf]

## Supporting Information

### 3-Nitroatenolol: First Synthesis, Chiral Resolution and Enantiomers' Absolute Configuration

Rosa Sparaco,<sup>1</sup> Pierfrancesco Cinque,<sup>1</sup> Antonia Scognamiglio,<sup>1</sup> Angela Corvino,<sup>1</sup> Giuseppe Caliendo,<sup>1</sup> Ferdinando Fiorino,<sup>1</sup> Elisa Magli,<sup>2</sup> Elisa Perissutti,<sup>1</sup> Vincenzo Santagada,<sup>1</sup> Beatrice Severino,<sup>1</sup> Paolo Luciano,<sup>1</sup> Marcello Casertano,<sup>1</sup> Anna Aiello,<sup>1</sup> Gustavo Yuri Martins Viegas,<sup>3,4</sup> Gilberto De Nucci,<sup>3,4,\*</sup> and Francesco Frecentese<sup>1</sup>

<sup>1</sup> *Department of Pharmacy, University of Naples Federico II, Via D. Montesano 49, Naples, Italy*

<sup>2</sup> *Department of Public Health, University of Naples Federico II, Via Pansini 5, Naples, Italy*

<sup>3</sup> *Department of Pharmacology, Faculty of Medical Sciences, State University of Campinas (UNICAMP), São Paulo, Campinas, Brazil*

<sup>4</sup> *Department of Health Studies, Metropolitan University of Santos (UNIMES), Santos-SP, Brazil.*

#### Content:

|                                                                                                                   |               |
|-------------------------------------------------------------------------------------------------------------------|---------------|
| Chiral analytical HPLC: stereochemical purity and LC/MS analyses for (+)-3-nitroatenol and (-)-3-nitroatenol..... | pages S2-S5   |
| Mono and bidimensional NMR spectra of (±)-3-nitroatenol.....                                                      | pages S6-S7   |
| LC-MS spectra of (±)-3-nitroatenol pre-SCX and post-SCX pretreatment.....                                         | page S8       |
| <sup>1</sup> H-NMR, COSY, HSQC, HMBC and HRMS spectra for bis-MPA derivatives of (+)-3-nitroatenol.....           | pages S9-S14  |
| <sup>1</sup> H-NMR, HMBC and HRMS spectra for bis-MPA derivatives of (-)-3-nitroatenol.....                       | pages S15-S18 |

## Peak 1 - (+)-3-nitroatenolol

| Item                | Specification     | Result    |
|---------------------|-------------------|-----------|
| Appearance          | Yellow powder     | Compliant |
| Purity              | LC-MS purity >95% | Compliant |
| Enantiomeric purity | HPLC > 95%        | Compliant |
| Amount              | 23.7 mg           |           |

## Stereochemical purity

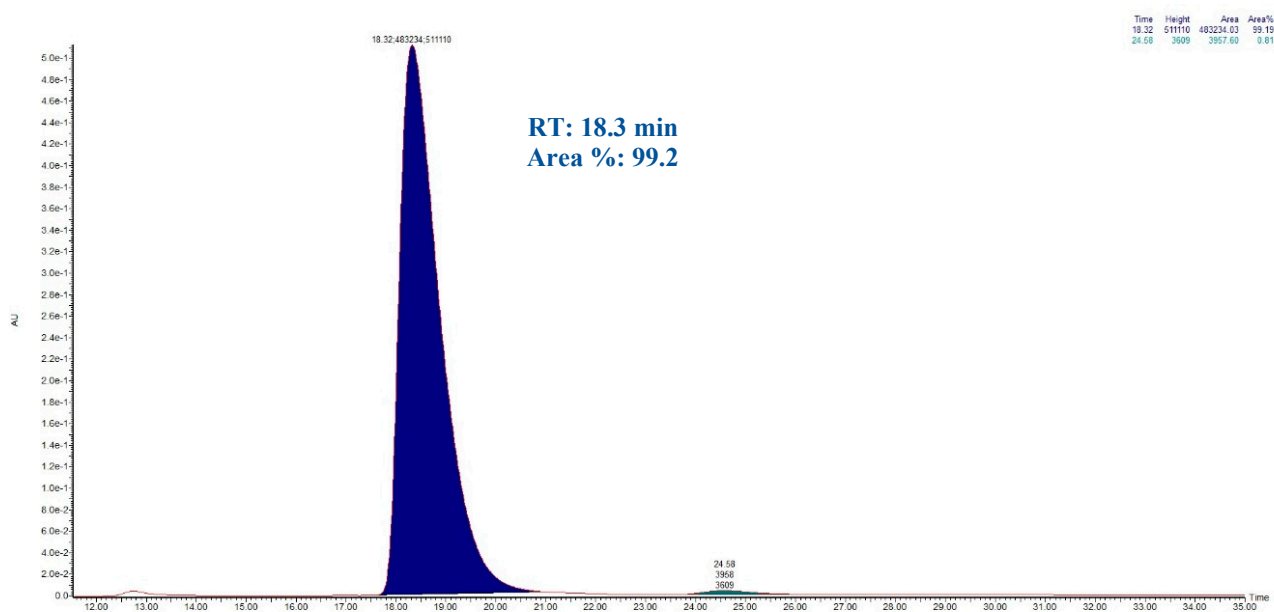

**Figure S1** – chiral analytical HPLC: analysis of (+)-3-nitroatenolol

|                   |                                |                      |                        |
|-------------------|--------------------------------|----------------------|------------------------|
| <b>Sample:</b>    | NAT1 – Peak 1                  | <b>Flow:</b>         | 1 mL/min               |
| <b>Column:</b>    | 5 AMY-Coat -5 µm<br>Phenomenex | <b>Wavelength:</b>   | 254/280 nm             |
| <b>Dimension:</b> | 250 x 4,6 mm                   | <b>Mobile Phase:</b> | n-hexane-ethanol 80:20 |

## LC-MS Analysis - Peak 1 - (+)-3-nitroatenolol

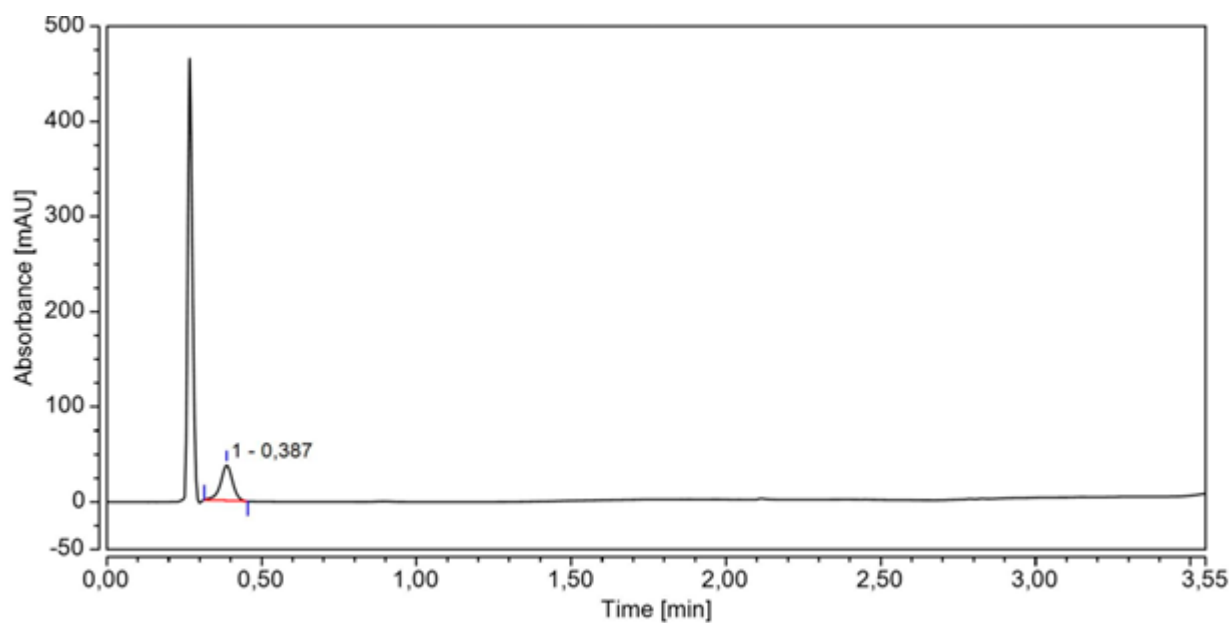

| Peak Name | Retention Time<br>min | Area<br>mAU*min | Relative Area<br>% |
|-----------|-----------------------|-----------------|--------------------|
| 1         | 0.38                  | 1.67            | 100                |

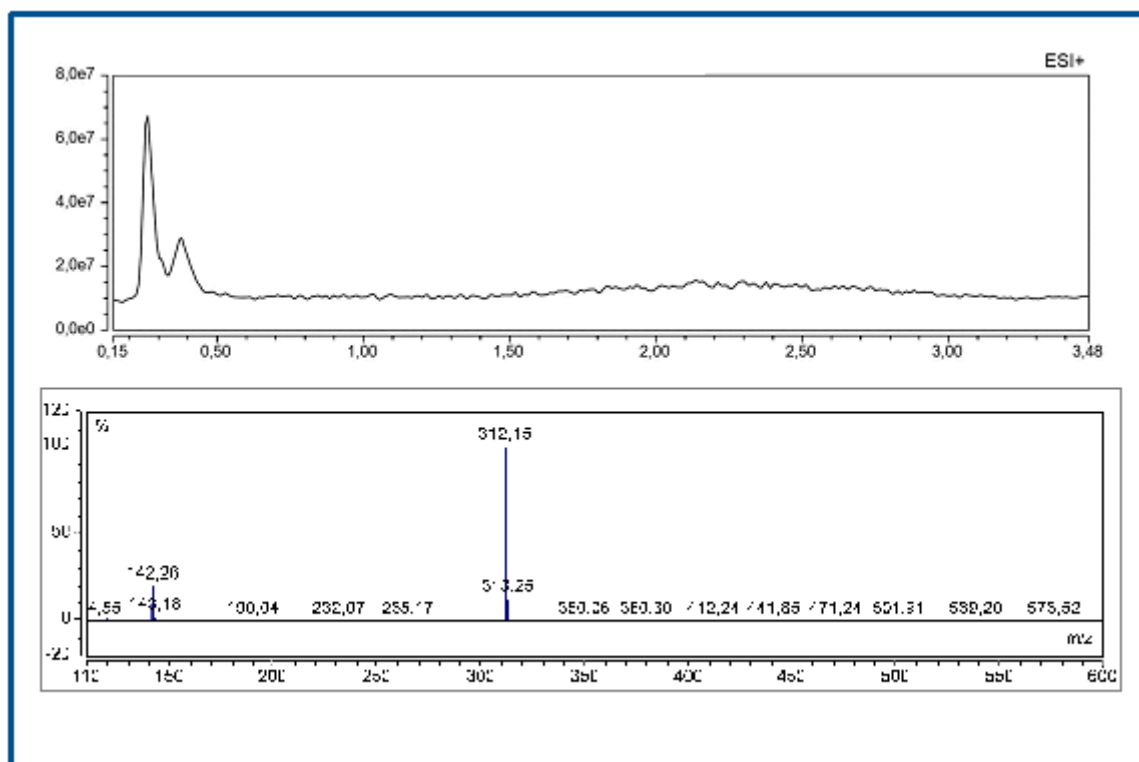

## Peak 2 - (-)-3-nitroatenolol

| Item                | Specification     | Result    |
|---------------------|-------------------|-----------|
| Appearance          | Yellow powder     | Compliant |
| Purity              | LC-MS purity >95% | Compliant |
| Enantiomeric purity | HPLC > 95%        | Compliant |
| Amount              | 23.7 mg           |           |

## Stereochemical purity

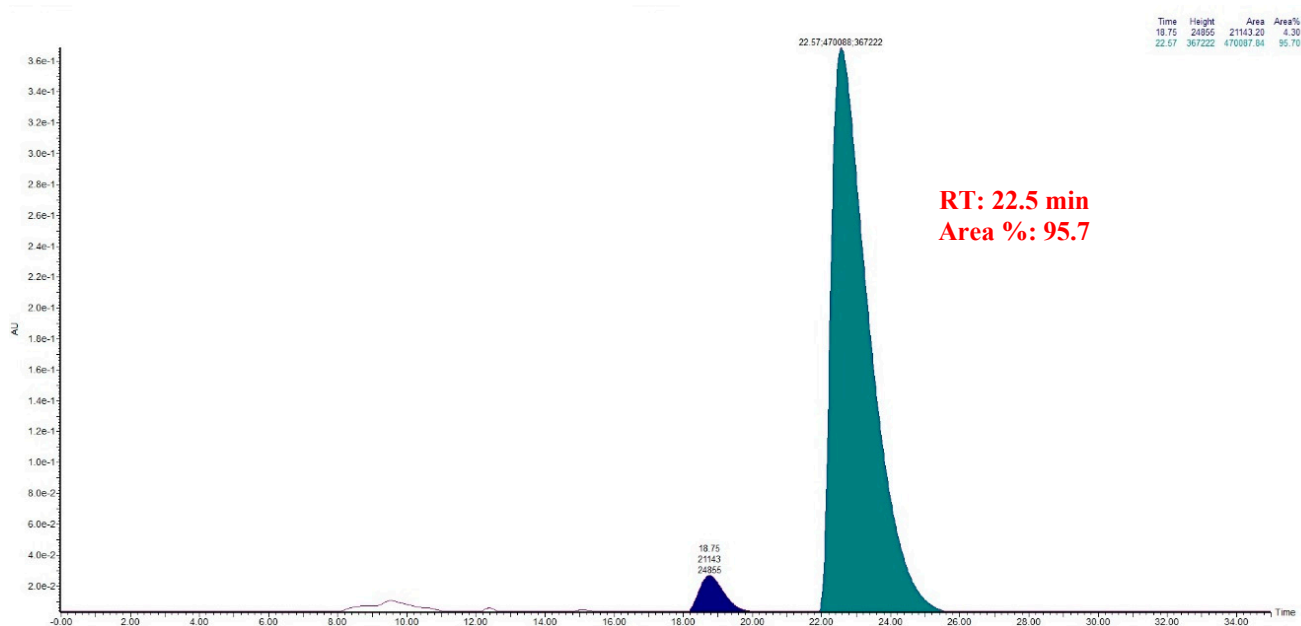

Figure S2 – chiral analytical HPLC: analysis of (-)-3-nitroatenolol.

|            |                                |               |                        |
|------------|--------------------------------|---------------|------------------------|
| Sample:    | NAT1 – Peak 2                  | Flow:         | 1 mL/min               |
| Column:    | 5 AMY-Coat -5 µm<br>Phenomenex | Wavelength:   | 254/280 nm             |
| Dimension: | 250 x 4,6 mm                   | Mobile Phase: | n-hexane-ethanol 80:20 |

## LC-MS Analysis

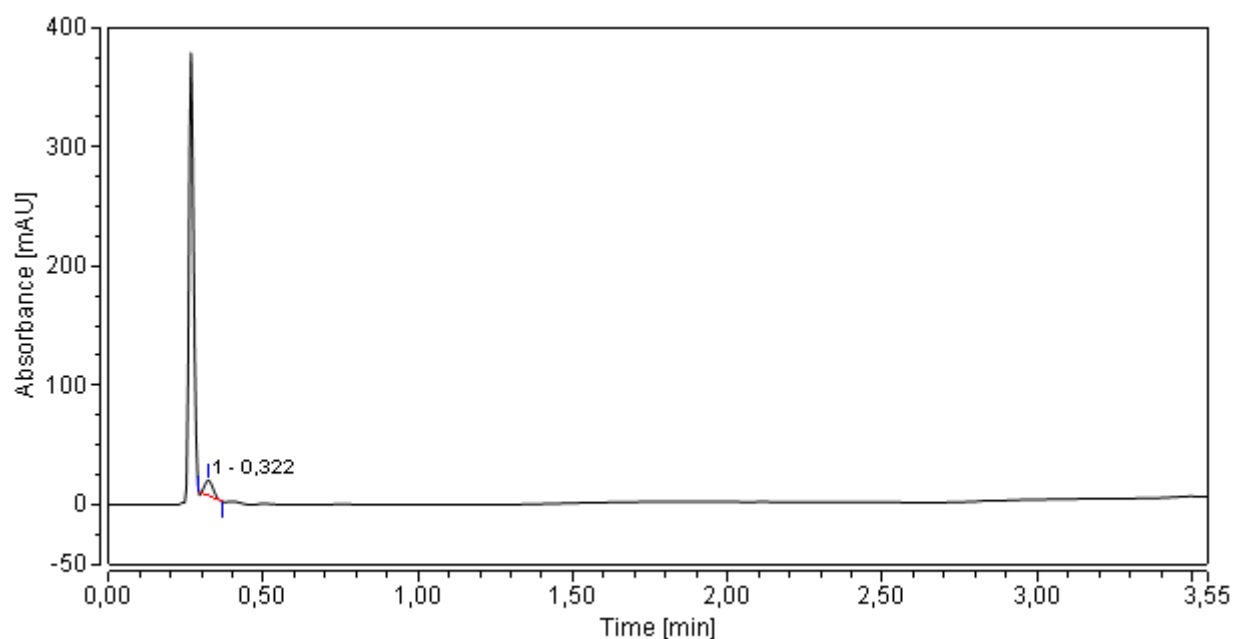

| Peak Name | Retention Time<br>min | Area<br>mAU*min | Relative Area<br>% |
|-----------|-----------------------|-----------------|--------------------|
| <b>1</b>  | 0.32                  | 0.37            | 100                |

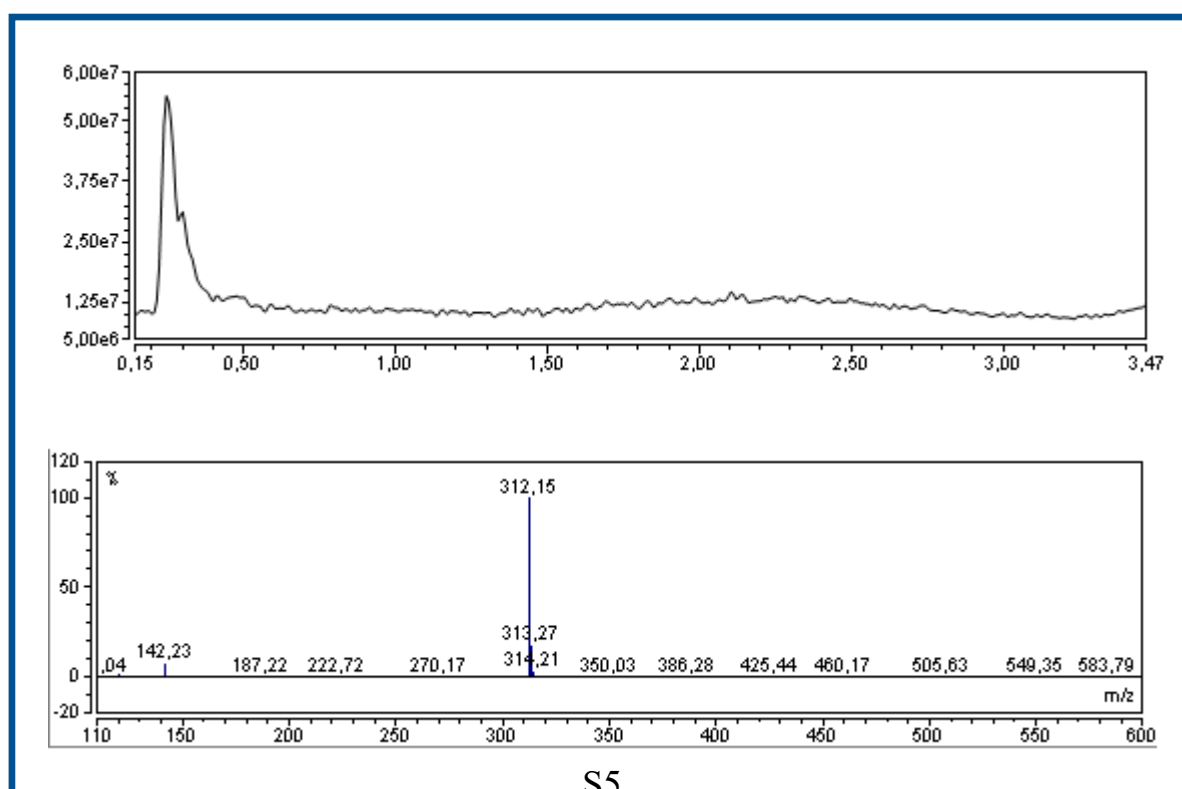

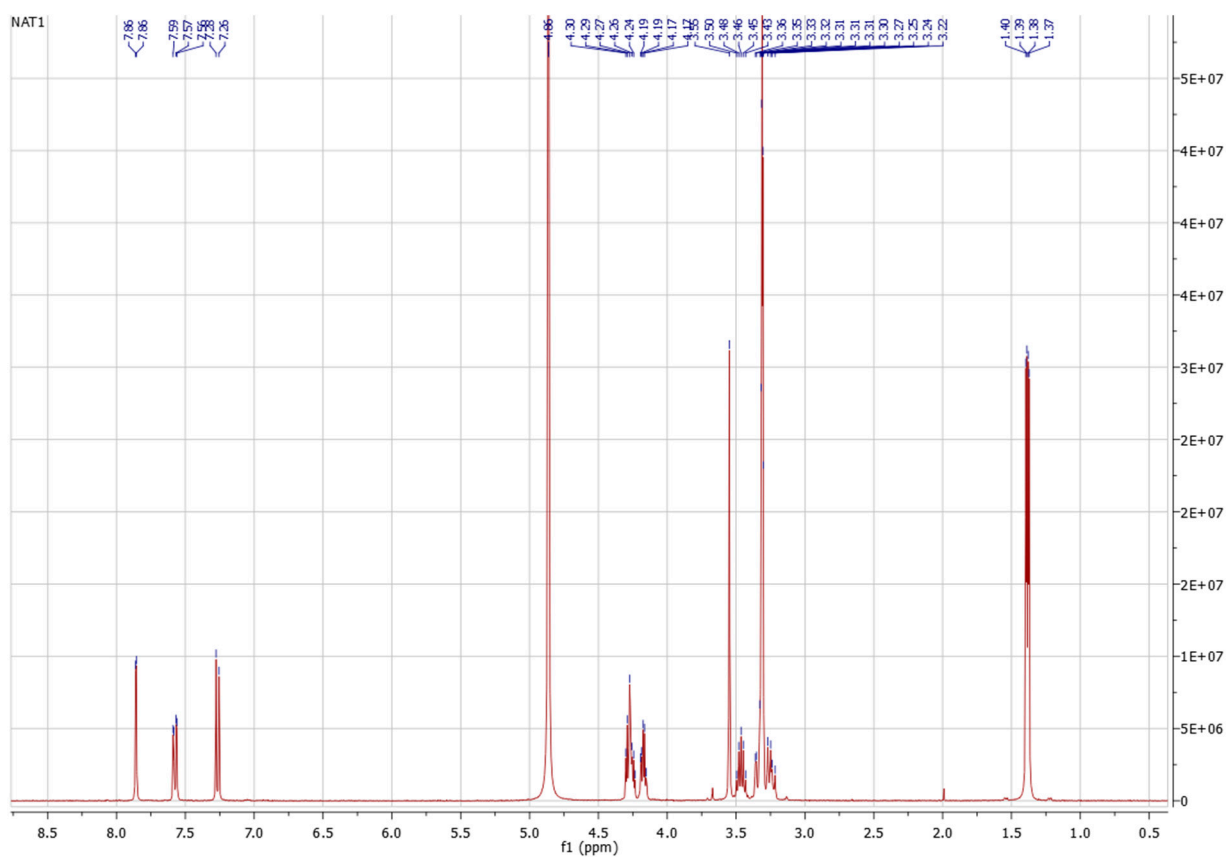

**Figure S3 -  $^1\text{H}$ -NMR of 3-nitroatenolol ( $\text{CD}_3\text{OD}$ )**

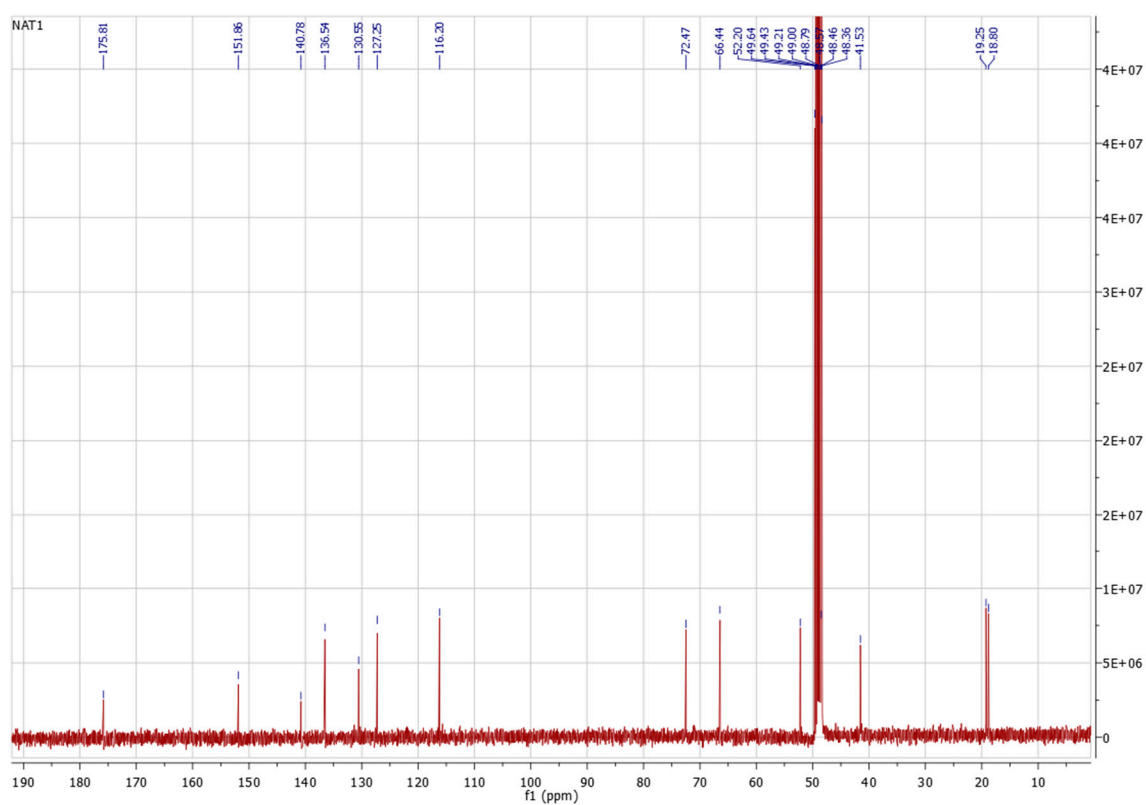

**Figure S4 -  $^{13}\text{C}$ -NMR of 3-nitroatenolol ( $\text{CD}_3\text{OD}$ )**

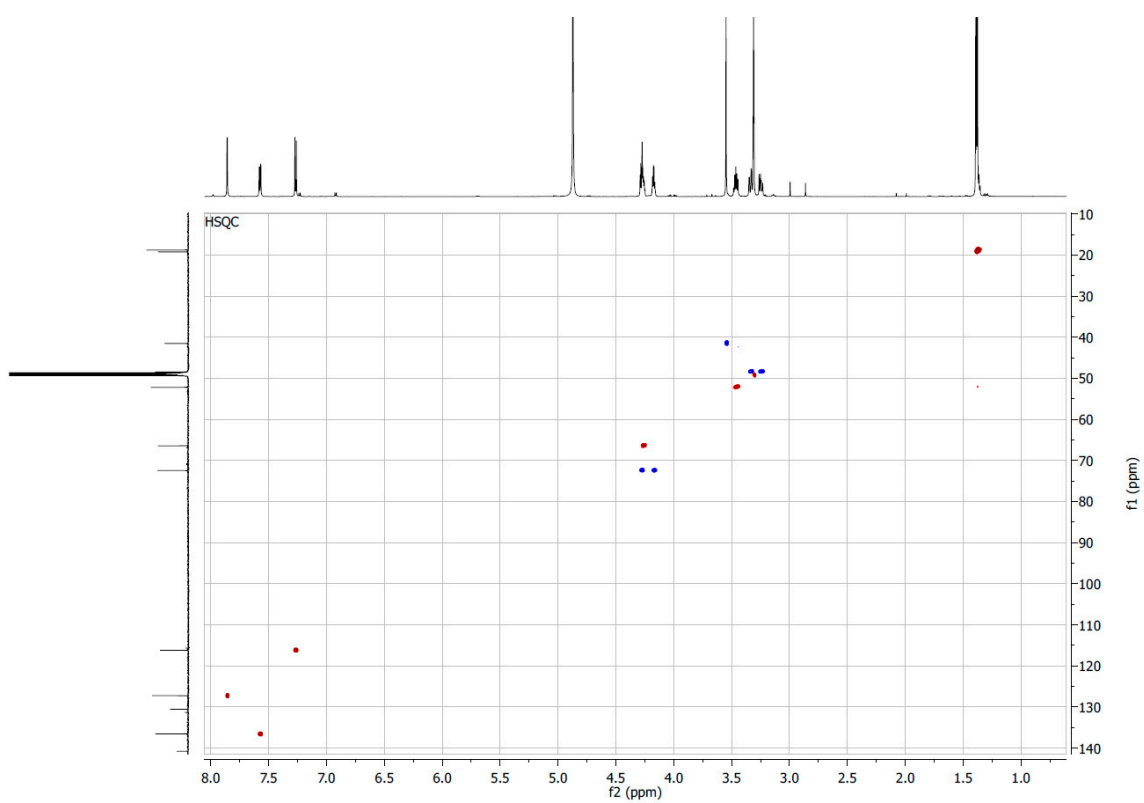

**Figure S5 - HSQC of 3-nitroatenolol**

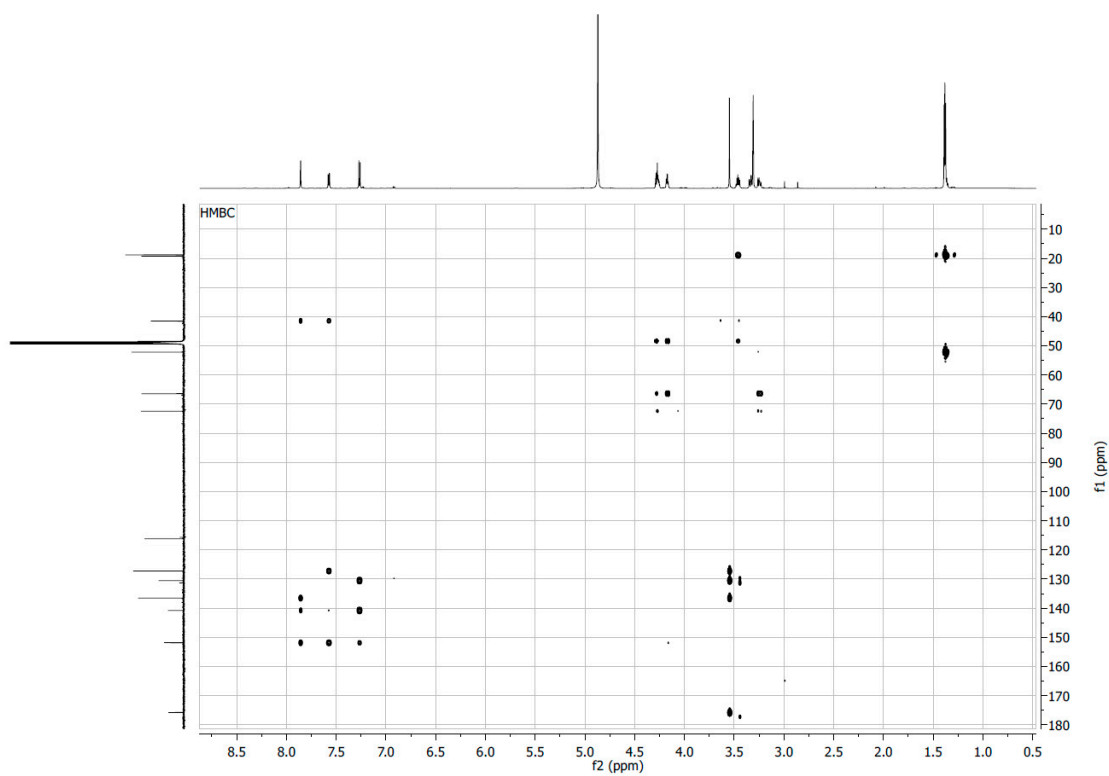

**Figure S6 - HMBC of 3-nitroatenolol**

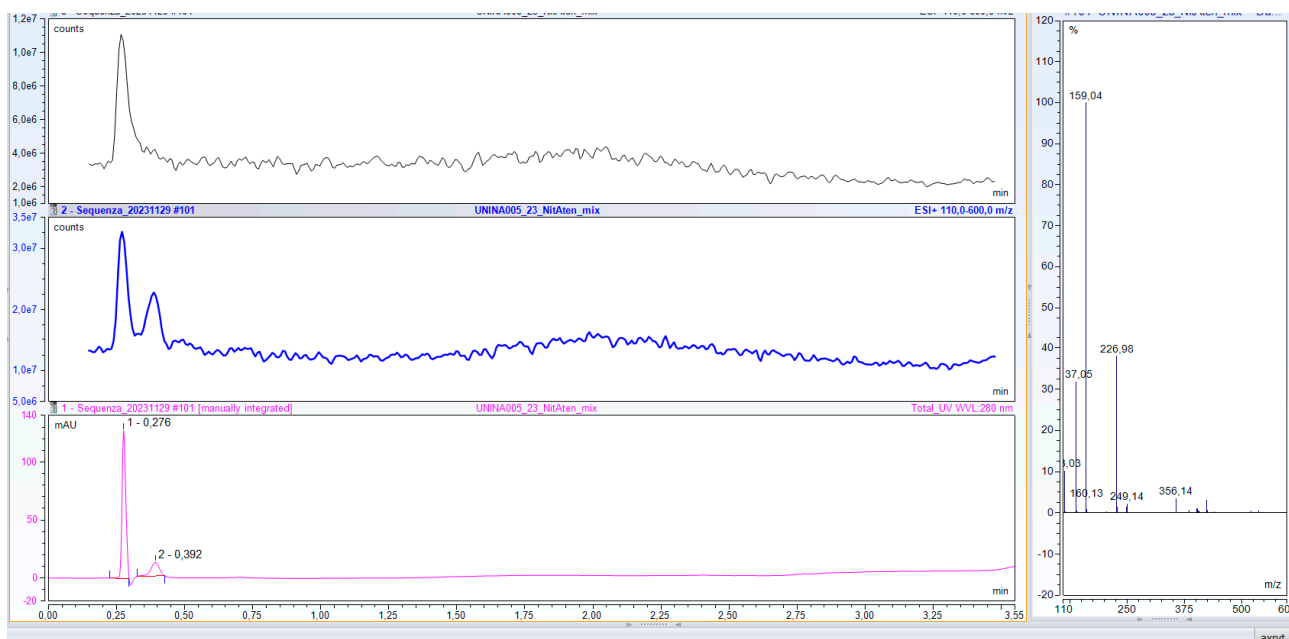

**Figure S7** - LC-MS of (±)-3-nitroatenolol Pre-SCX. Mass spectrum in ESI<sup>+</sup> (blue profile) matches with MW of compound. We detect in ESI<sup>-</sup> (black profile) a peak corresponding to TFA (Dimer in negative mode: 226.9).

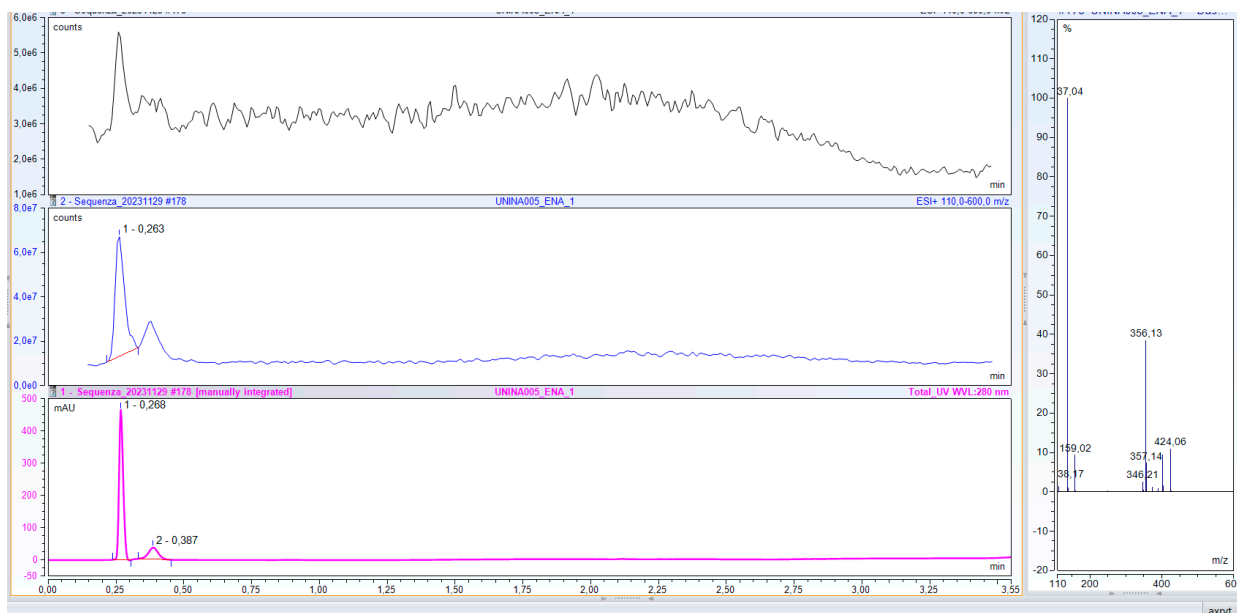

**Figure S8** - LC-MS of (±)-3-nitroatenolol Post-SCX. In ESI<sup>-</sup> (black profile) we observed only a peak corresponding to 3-nitroatenolol [M+HCOOH]<sup>-</sup>



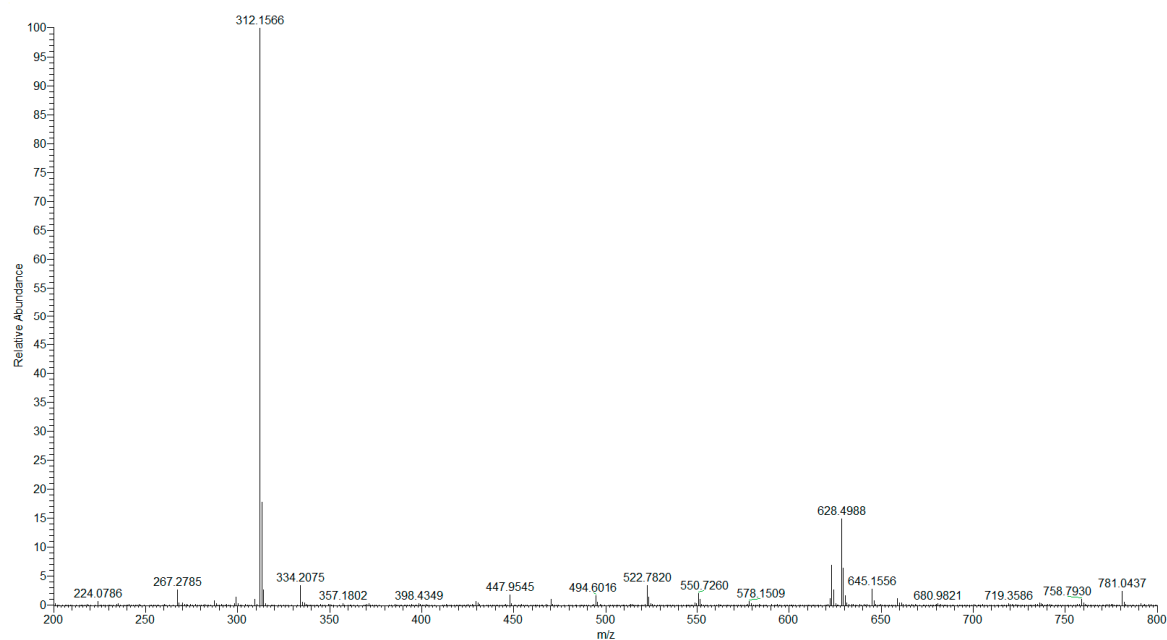

**Figure S9** - HRESI-MS spectrum of (±)-3-nitroatenolol.

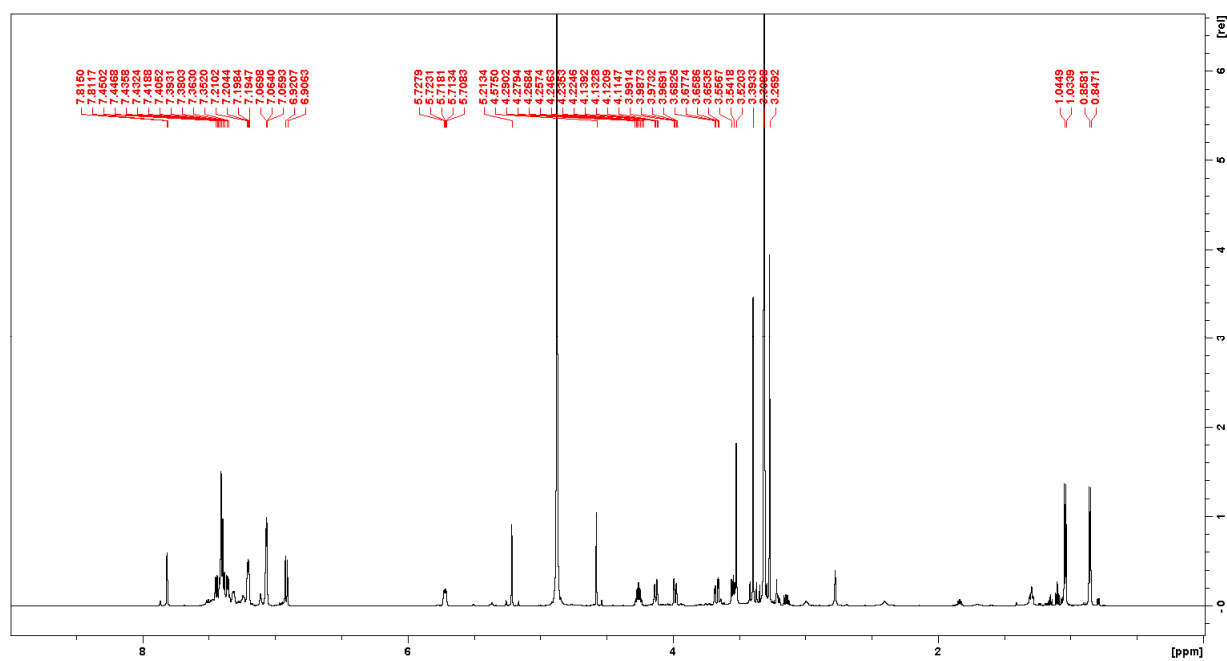

**Figure S10** - <sup>1</sup>H NMR spectrum in CD<sub>3</sub>OD of bis-(R)-MPA-(+)-3-nitroatenolol.

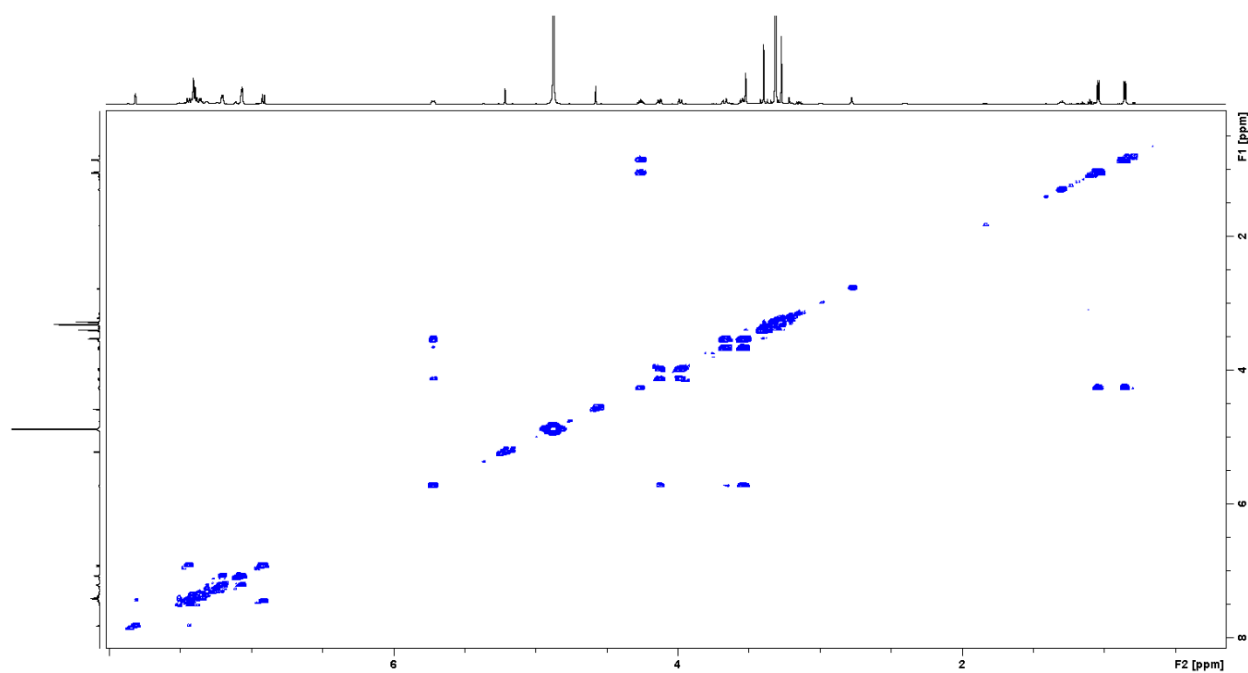

**Figure S11** – COSY spectrum in CD<sub>3</sub>OD of bis-(R)-MPA-(+)-3-nitroatenolol.

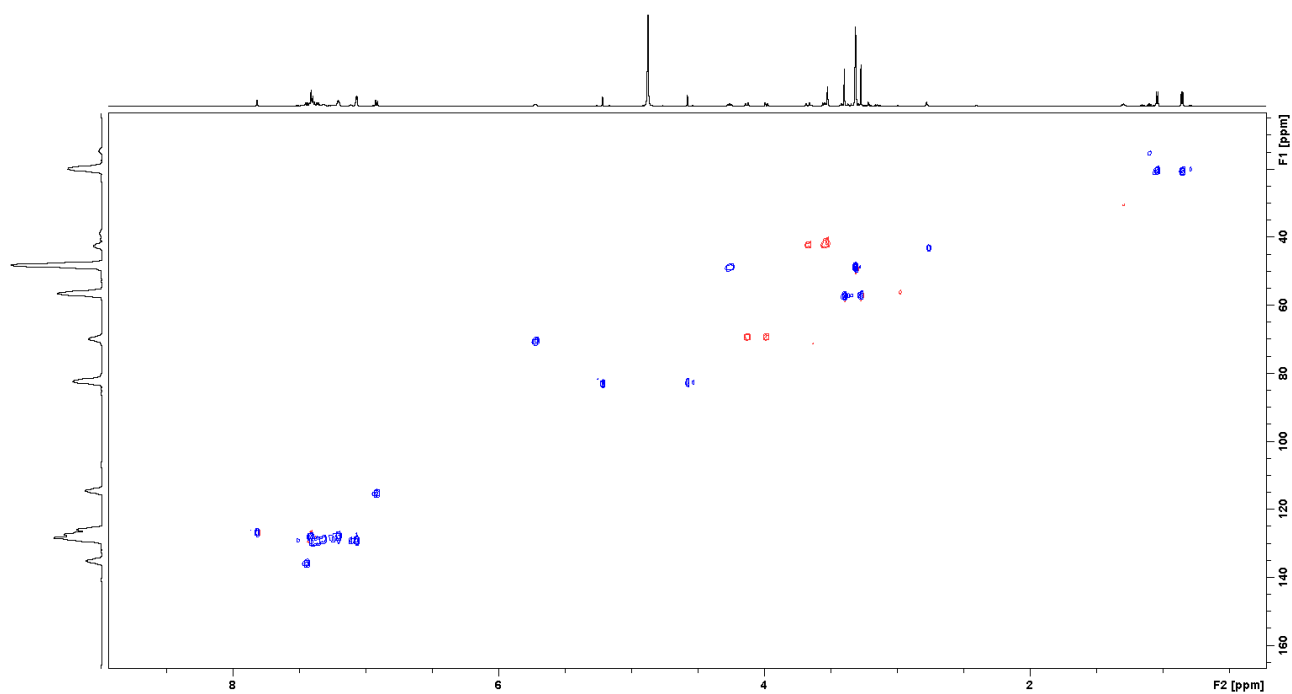

**Figure S12** - HSQC spectrum in CD<sub>3</sub>OD of bis-(R)-MPA-(+)-3-nitroatenolol.

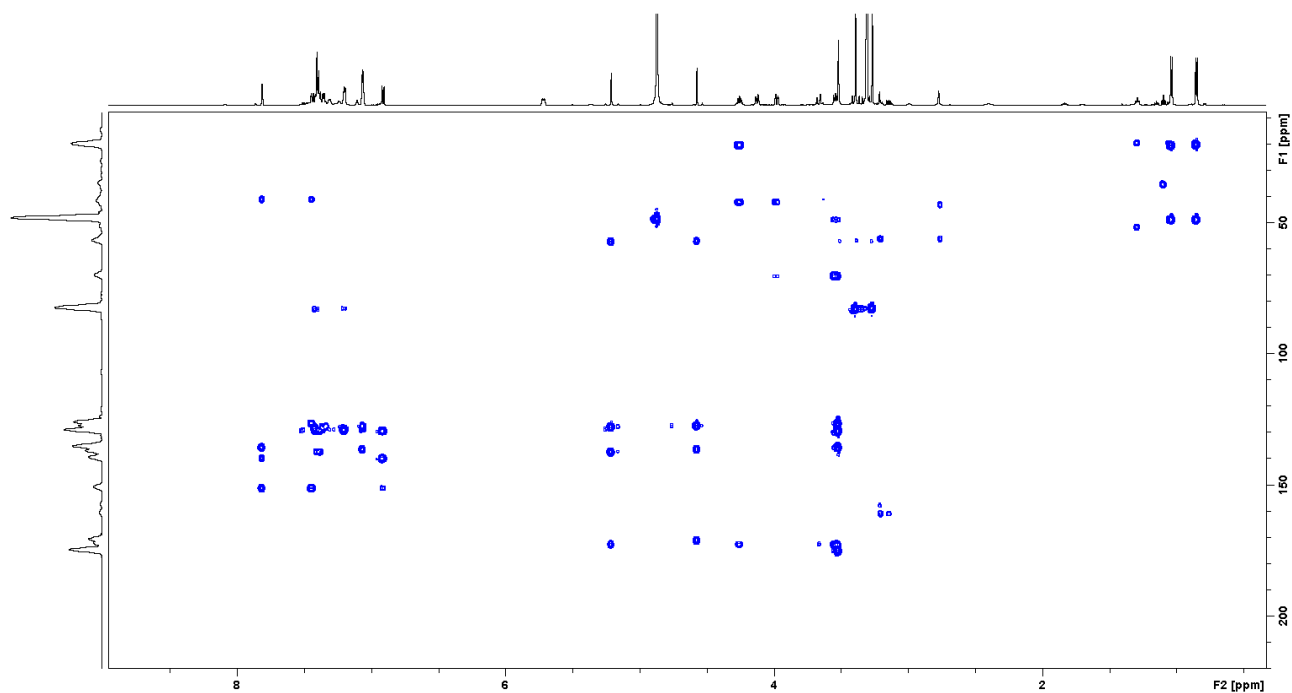

**Figure S13-** HMBC spectrum in CD<sub>3</sub>OD of bis-(R)-MPA-(+)-3-nitroatenolol.

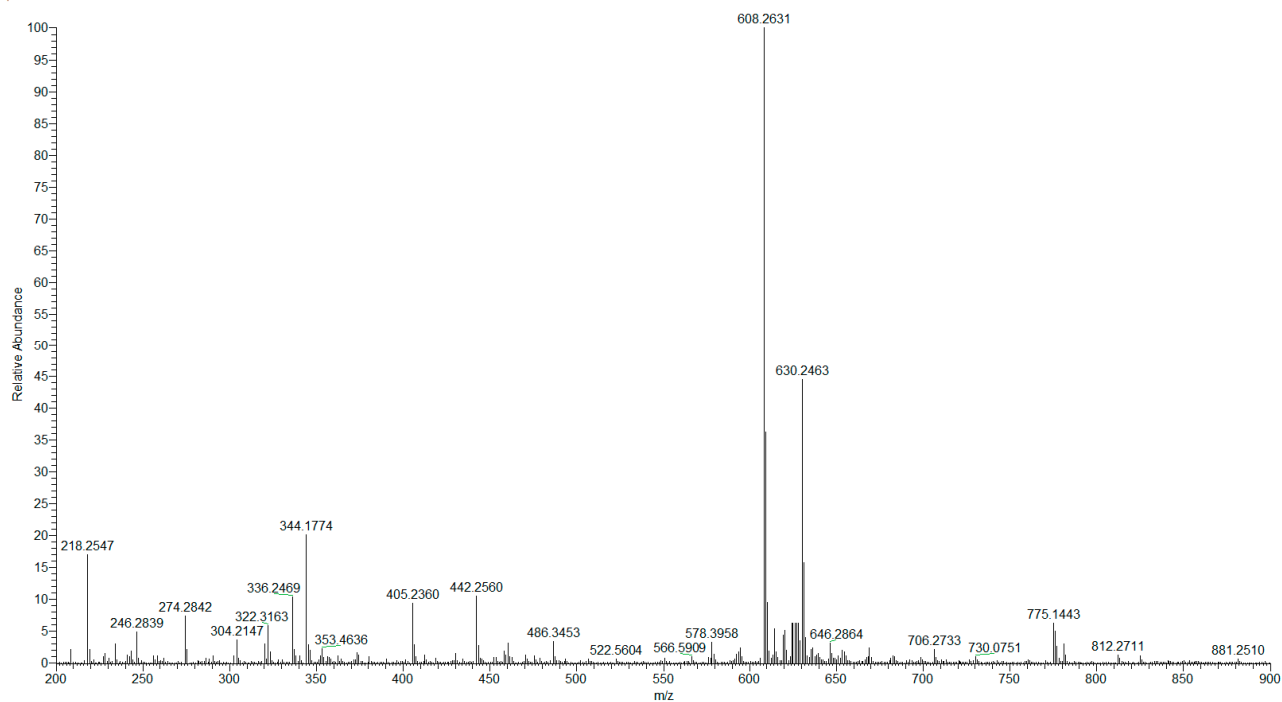

**Figure S14 –** HRESI-(+)-MS spectrum of bis-(R)-MPA-(+)-3-nitroatenolol.

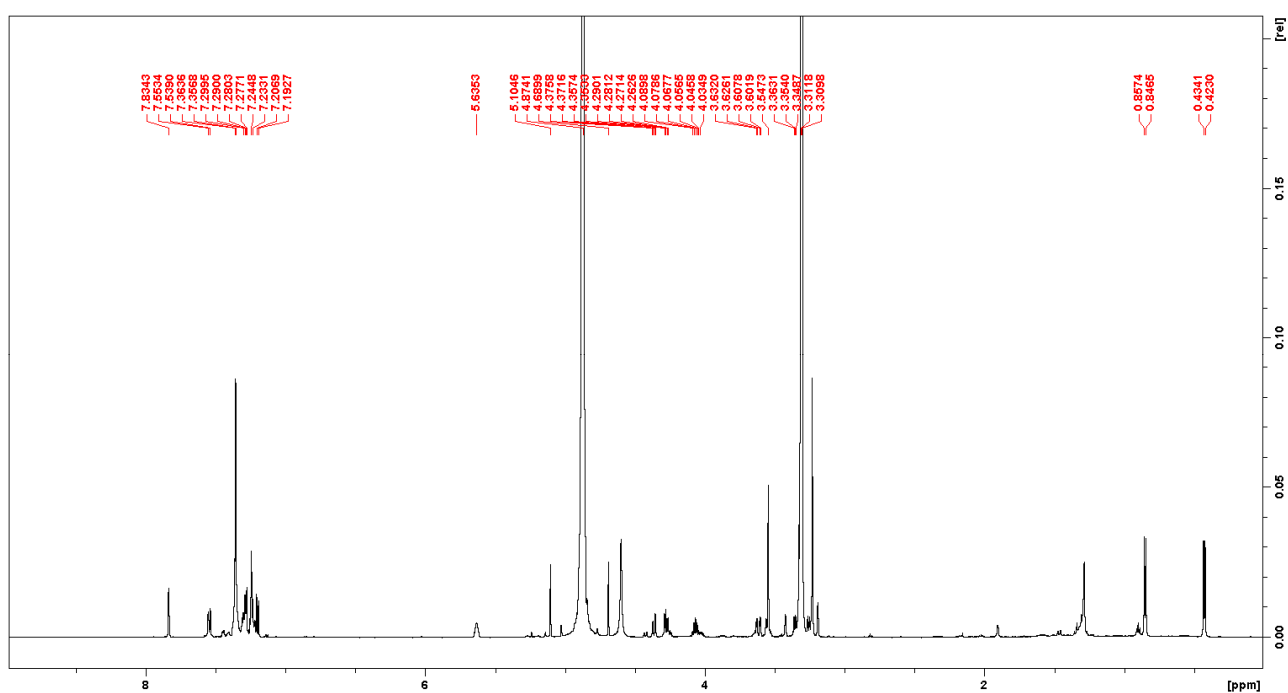

**Figure S15-** <sup>1</sup>H-NMR of bis-(S)-MPA-(+)-3-nitroatenolol.

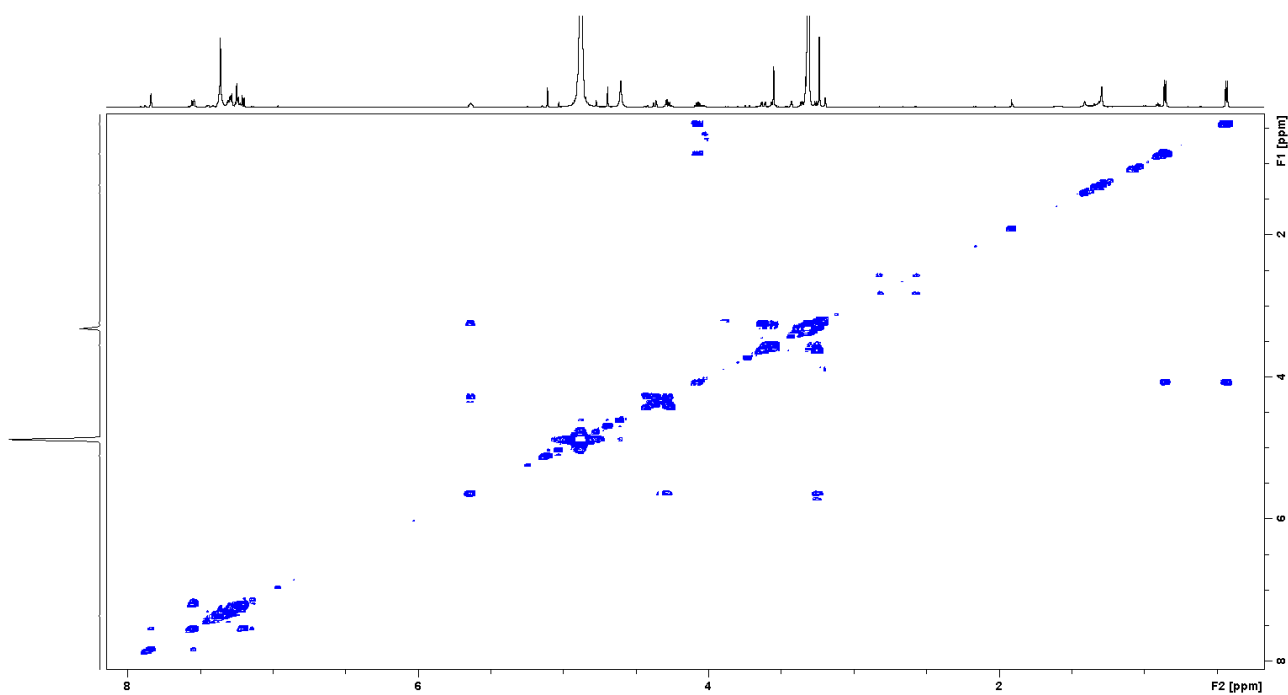

**Figure S16 –** COSY spectrum of bis-(S)-MPA-(+)-3-nitroatenolol.

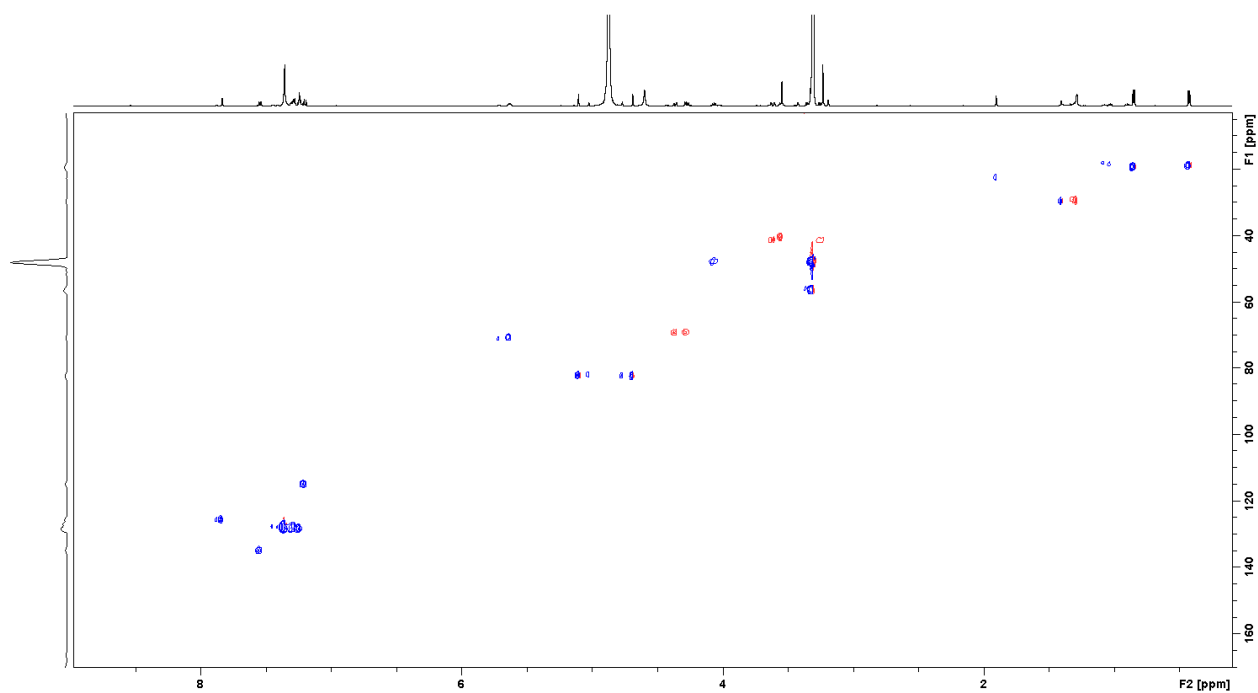

**Figure S17** – HSQC spectrum of bis-(S)-MPA-(+)-3-nitroatenolol.

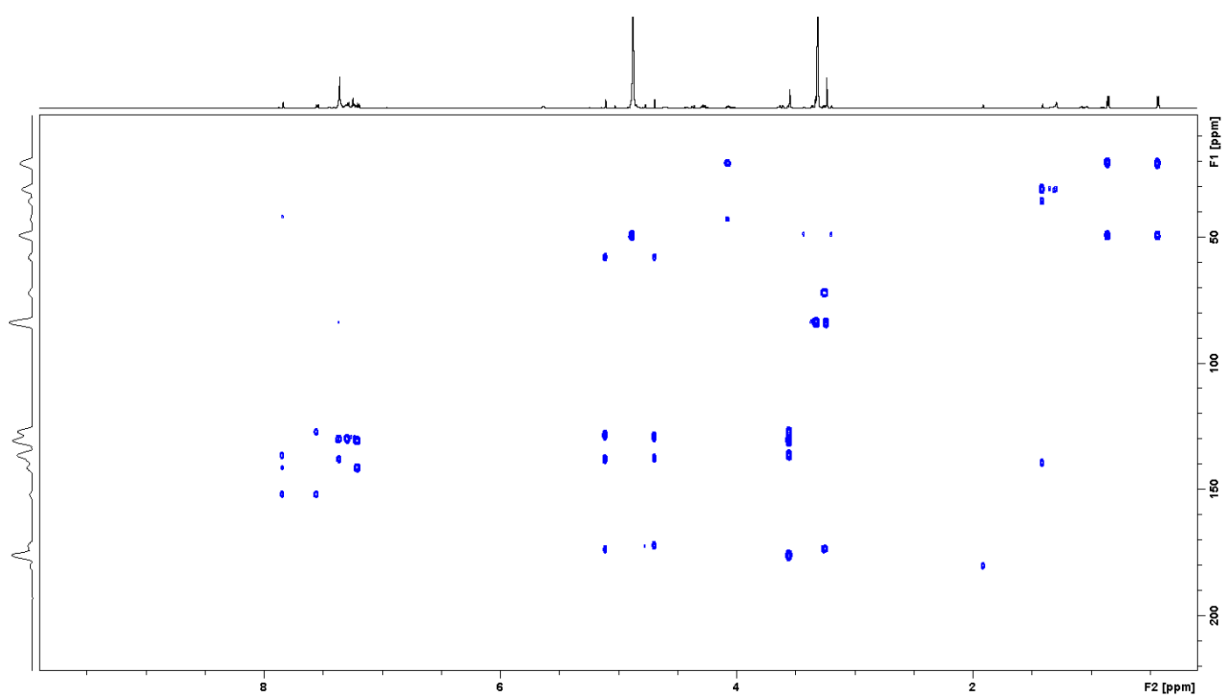

**Figure S18** – HMBC spectrum of bis-(S)-MPA-(+)-3-nitroatenolol.

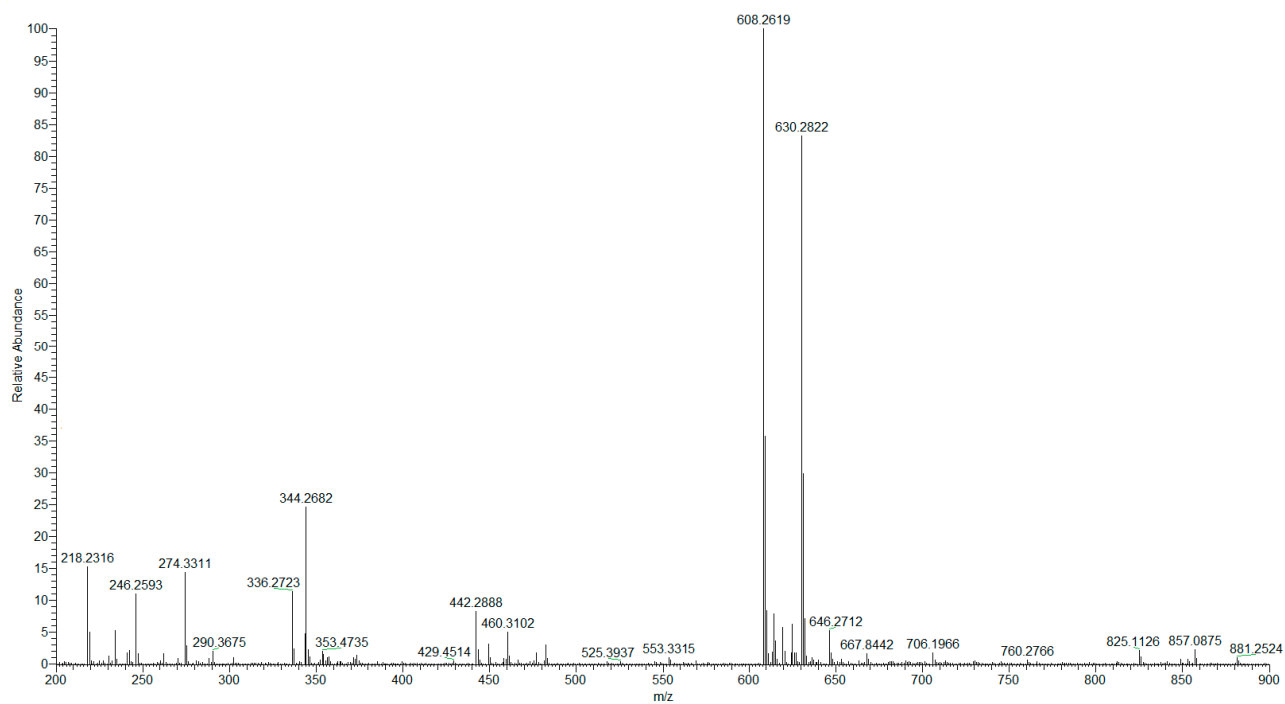

**Figure S19** – HRESI-(+)-MS spectrum of bis-(S)-MPA-(+)-3-nitroatenolol.

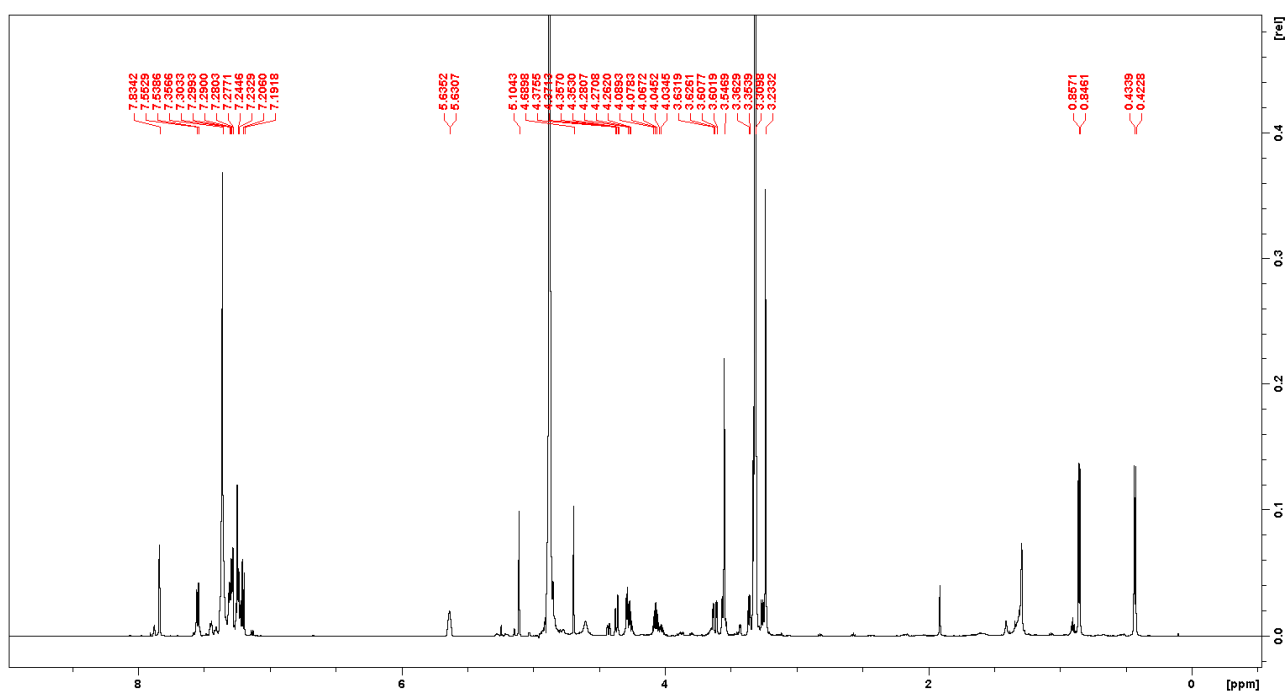

**Figure S20** – NMR signals of bis-(R)-MPA derivative of (-)-3-nitroatenolol.

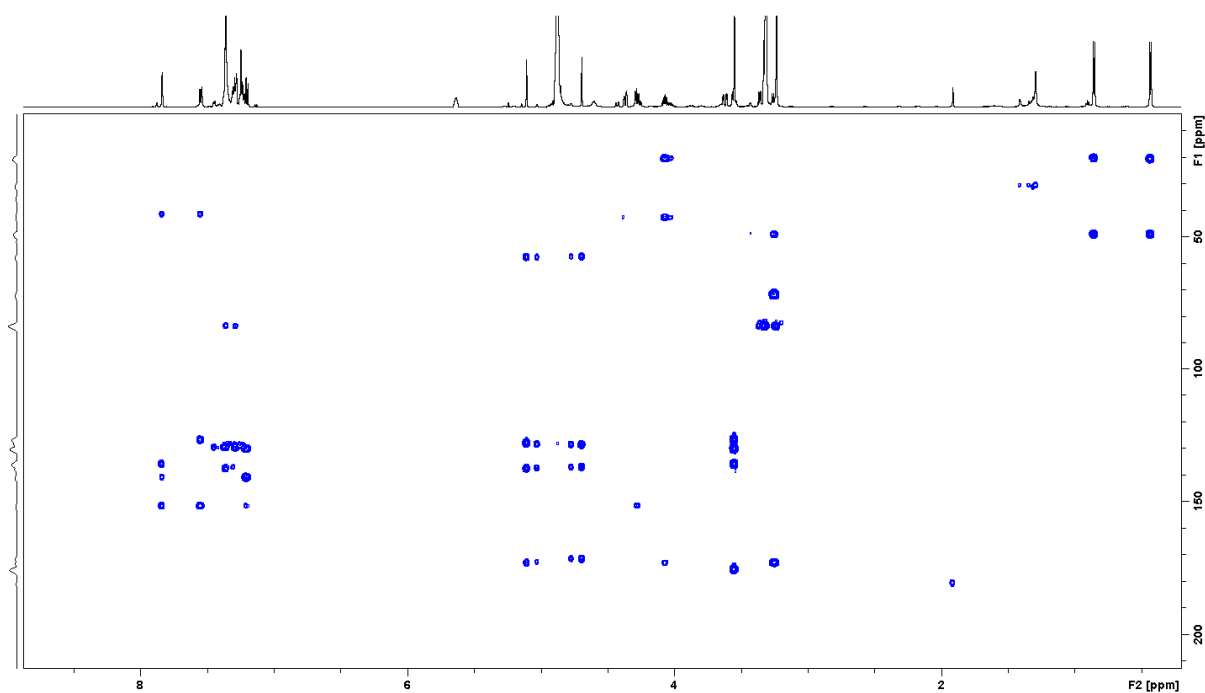

**Figure S21** – HMBC spectrum of bis-(R)-MPA-(-)-3-nitroatenolol.

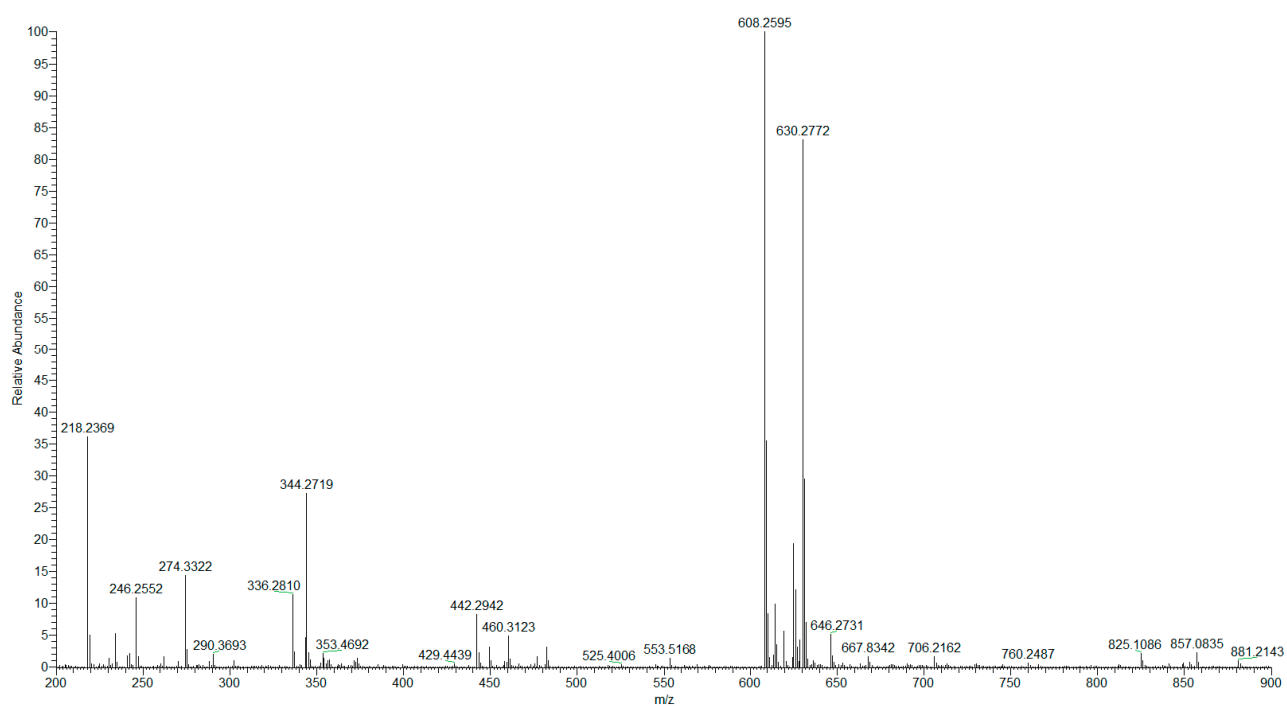

**Figure S22** – HRESI-MS spectrum of bis-(R)-MPA-(-)-3-nitroatenolol.



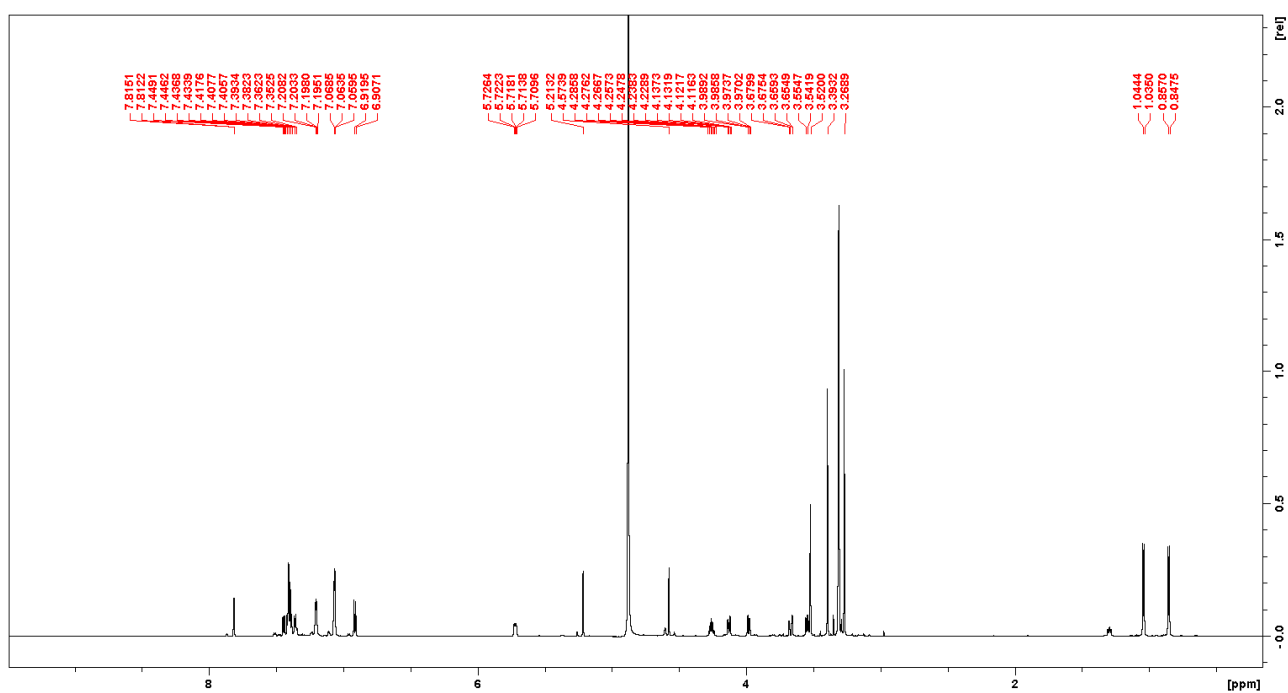

**Figure S23** – NMR signals of bis-(S)-MPA derivative of (-)-3-nitroatenolol.

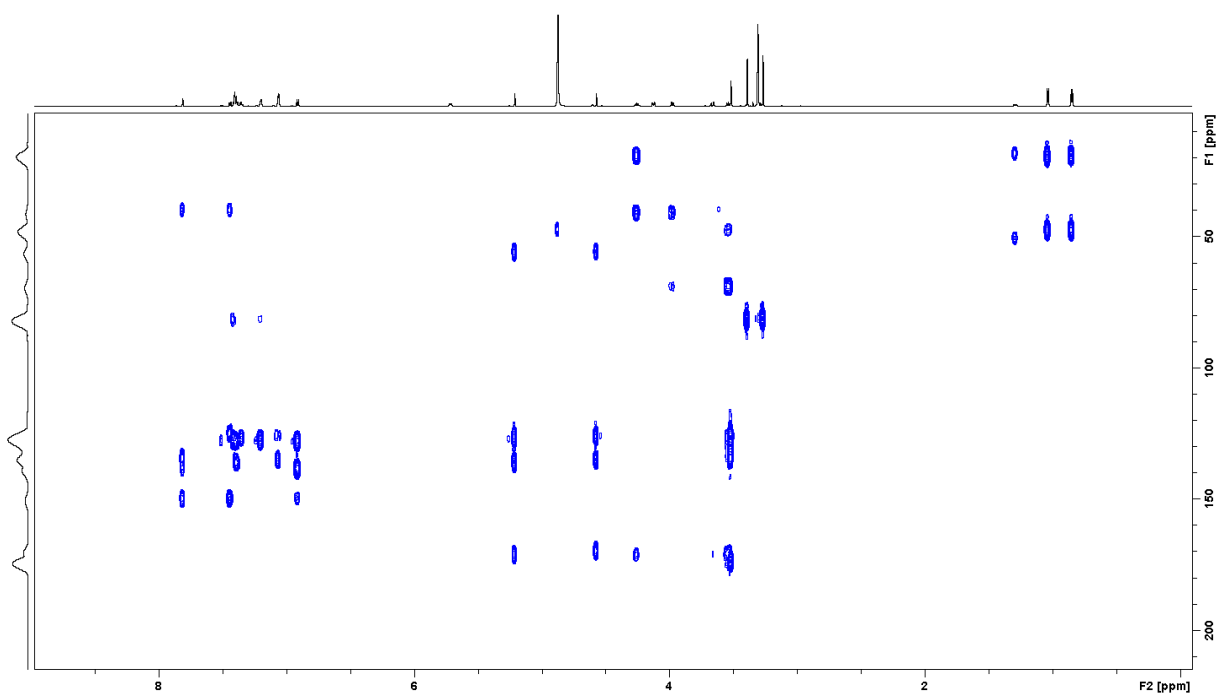

**Figure S24** - HMBC of bis-(S)-MPA-(-)-3-nitroatenolol.

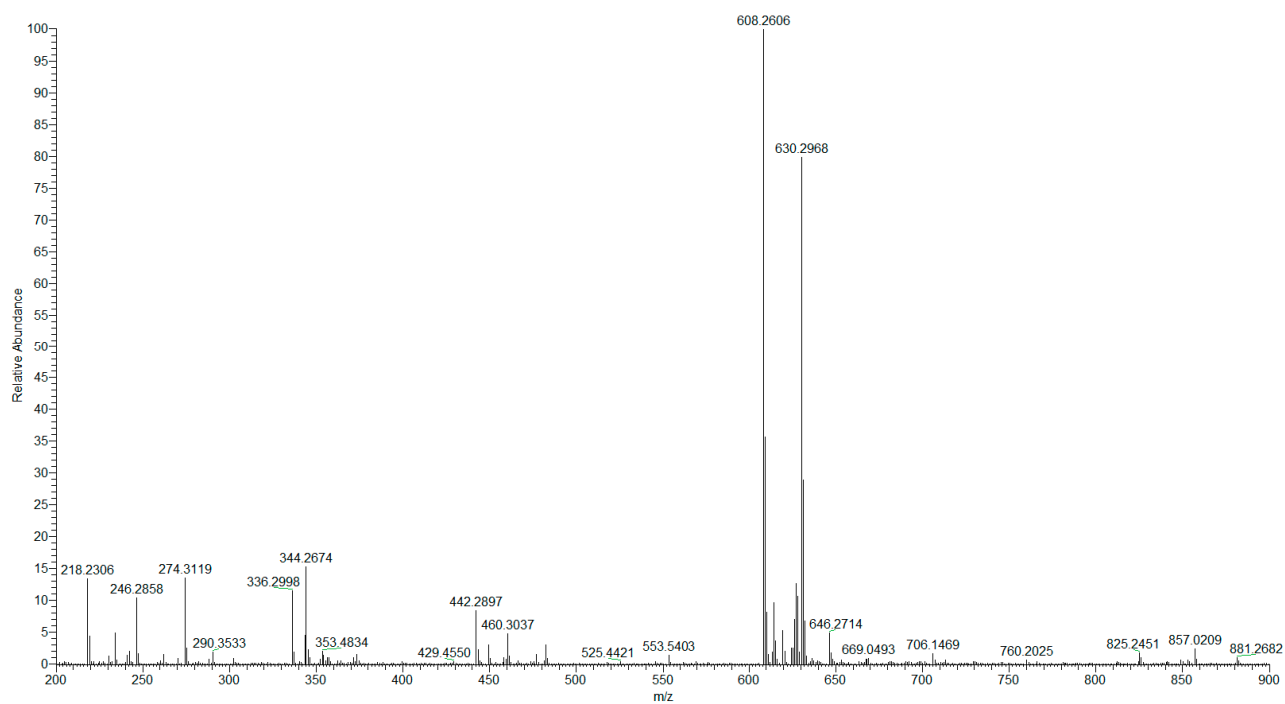

**Figure S25** – HRESI-MS spectrum of bis-(S)-MPA-(-)-3-nitroatenolol.
